1           **Assessing Comparative Microbiome Performance in Plant Cell Wall Deconstruction**  
2                           **Using Multi-‘omics-Informed Network Analysis**

3   Lauren M. Tom<sup>1,2†</sup>, Martina Aulitto<sup>1,2†</sup>, Yu-Wei Wu<sup>3</sup>, Kai Deng<sup>1,4</sup>, Yu Gao<sup>1,5</sup>, Naijia Xiao<sup>6</sup>,  
4   Beatrice Garcia Rodriguez<sup>7</sup>, Clifford Louime<sup>7</sup>, Trent R. Northen<sup>1,5</sup>, Aymerick Eudes<sup>1,5</sup>, Jenny C.  
5   Mortimer<sup>1,5,8</sup>, Paul Adams<sup>1,9,10</sup>, Henrik Scheller<sup>1,5</sup>, Blake A. Simmons<sup>1,2</sup>, Javier A. Ceja-  
6   Navarro<sup>1,2,11\*</sup> and Steven W. Singer<sup>1,2\*</sup>

7  
8   <sup>1</sup>Joint BioEnergy Institute, Emeryville, CA 94608

9   <sup>2</sup>Biological Systems and Engineering Division, Lawrence Berkeley National Laboratory,  
10   Berkeley, CA 94720

11   <sup>3</sup>Graduate Institute of Biomedical Informatics, College of Medical Science and Technology, Taipei  
12   Medical University, Taipei 110, Taiwan

13   <sup>4</sup>Biotechnology and Bioengineering Department, Sandia National Laboratories, Livermore, CA  
14   94551

15   <sup>5</sup>Environmental Systems and Genome Biology Division, Lawrence Berkeley National Laboratory,  
16   Berkeley, CA 94720

17   <sup>6</sup>Institute of Environmental Genomics and Department of Microbiology and Plant Biology,  
18   University of Oklahoma, Norman, OK 73019

19   <sup>7</sup>College of Natural Sciences, University of Puerto Rico-Rio Piedras, PR

20   <sup>8</sup>School of Agriculture, Food and Wine, & Waite Research Institute, University of Adelaide, Glen  
21   Osmond, SA, 5064, Australia

22   <sup>9</sup>Molecular Biophysics and Integrated Bioimaging, Lawrence Berkeley National Laboratory,  
23   Berkeley, CA 94720

- 24 <sup>10</sup>Department of Bioengineering, University of California Berkeley, Berkeley, CA 94720
- 25 <sup>11</sup> Institute for Biodiversity Science and Sustainability, California Academy of Sciences, San
- 26 Francisco, California, USA
- 27 † Lauren M. Tom and Martina Aulitto contributed equally to this work
- 28 \*Correspondence: [SW Singer@lbl.gov](mailto:SW Singer@lbl.gov) & [JC Navarro@lbl.gov](mailto:JC Navarro@lbl.gov)

29        **Abstract**

30        Plant cell walls are interwoven structures recalcitrant to degradation. Both native and adapted  
31        microbiomes are particularly effective at plant cell wall deconstruction. Studying these  
32        deconstructive microbiomes provides an opportunity to assess microbiome performance and relate  
33        it to specific microbial populations and enzymes. To establish a system assessing comparative  
34        microbiome performance, parallel microbiomes were cultivated on sorghum (*Sorghum bicolor* L.  
35        Moench) from compost inocula. Biomass loss and biochemical assays indicated that these  
36        microbiomes diverged in their ability to deconstruct biomass. Network reconstructions from time-  
37        dependent gene expression identified key deconstructive groups within the adapted sorghum-  
38        degrading communities, including *Actinotalea*, *Filomicrobium*, and Gemmanimonadetes  
39        populations. Functional analysis of gene expression demonstrated that the microbiomes proceeded  
40        through successional stages that are linked to enzymes that deconstruct plant cell wall polymers.  
41        This combination of network and functional analysis highlighted the importance of cellulose-  
42        active Actinobacteria in differentiating the performance of these microbiomes.

43

## 44 **Introduction**

45 Plant cell walls are complex structures that primarily contain the polysaccharide polymers  
46 cellulose, hemicellulose, and pectin as well as the aromatic polymer lignin<sup>1</sup>. The primary cell wall  
47 of grasses, such as sorghum (*Sorghum bicolor* L. Moench), is a thin layer consisting of cellulose  
48 and the hemicellulose xylan, and a small amount of pectin. The thicker secondary cell wall,  
49 deposited after plant cell growth ceases, contains cellulose, lignin, and hemicellulose. Chemical  
50 and biological deconstruction of plant cell walls to release the sugars and aromatics in the biomass  
51 is of great current interest for their subsequent conversion to biofuels and bio-based chemicals<sup>2-4</sup>.  
52 For biological deconstruction, microorganisms, including filamentous fungi, bacteria, and protists  
53 employ an armamentarium of enzymes that systematically deconstruct the plant cell wall<sup>5-7</sup>. These  
54 include hydrolytic and oxidative enzymes that deconstruct the polysaccharides and radical-based  
55 oxidative enzymes that deconstruct lignin<sup>8-10</sup>.

56 Though most understanding of biological cell wall deconstruction has been obtained from  
57 isolates, microbiomes that break down cell walls have emerged as new sources of microbes and  
58 enzymes<sup>11-15</sup>. These microbiomes feature successional structures that are linked to the mechanism  
59 of depolymerization in the cell wall<sup>16</sup>. Microbiomes that digest plant cell walls are readily  
60 cultivated from inocula rich in deconstructive microbes, like compost and rumen<sup>17,18</sup>. These  
61 cultivations have yielded microbiomes with reproducible structures and community dynamics,  
62 linking plant polymer deconstruction to individual microbes and enzymes. Development of  
63 parallel consortia from heterogeneous inocula leads to variations in microbiome structure, often  
64 referred to as founder effects, that may influence microbiome performance<sup>19</sup>. Therefore, the  
65 cultivation of parallel consortia is a promising strategy to link the structure and dynamics of

66 biomass-deconstructing microbiomes. These comparisons may identify key contributors to the  
67 deconstruction of cell wall components that differentiate the microbiomes.

68 Here, parallel microbiomes with different community structures were cultivated with  
69 sorghum biomass as the sole carbon source. The performance of these distinct microbiomes was  
70 compared in growth on forage sorghum varieties and this performance linked to specific  
71 populations by network and functional analyses of time-resolved metatranscriptomics.

72

## 73 **Materials and Methods**

### 74 *Sample Collection and Biomass Preparation*

75 Green waste compost was collected from the City of Berkeley  
76 (<https://www.cityofberkeley.info/freecompost/>) and transported to the lab at room temperature.  
77 Compost was sieved and stored at 4°C prior to use. Untreated ground *Sorghum bicolor* L. (25 mm  
78 particle size) was obtained from Idaho National Laboratory and washed, autoclaved, and dried in  
79 a 50C oven. The wild type and *brown midrib-6x12 (bmr-6x12)* forage sorghum were grown and  
80 harvested as previously described<sup>20</sup>. The forage sorghum samples were also washed, autoclaved,  
81 and dried as described above. Moisture content was measured using a moisture analyzer (Mettler  
82 Toledo Moisture Balance HB43-S).

83

### 84 *Enrichment/Priming (Tier 1)*

85 Green waste compost (0.1 g), 50 mL of M9TE<sup>21</sup> (pH 6.5), and 0.5 g of sorghum were inoculated  
86 in 250 mL baffled Erlenmeyer flasks. Three parallel incubations, along with a negative control  
87 without inoculant, were incubated at 50 °C at 200 rpm and adjusted for evaporation using filter-  
88 sterilized deionized water every 2-3 days. Passages were conducted every 2 weeks (Day 14, 28,  
89 42, and 56) by transferring 2 mL of culture to a new set of flasks. At the end of each passage, pH  
90 was measured and 500-µl aliquots were collected and centrifuged to separate pellet and supernatant  
91 fractions. DNA was extracted from the pellet fraction and sent for 16S rRNA gene and  
92 metagenomic sequencing. Additionally, for the final passage (Day 56), 3,5-dinitrosalicylic acid  
93 (DNS) assays<sup>22</sup> and nanostructure-initiator mass spectrometry (NIMS)<sup>23</sup> assays were performed  
94 on the supernatant fraction and the remaining material was filtered using Miracloth (Millipore  
95 Sigma, Burlington, MA, USA) and dried at 50 °C to determine the biomass dry weight.

96 *Dynamics (Tier 2)*

97 At Day 56, each of the three communities from Tier 1 (*comm1*, *comm2*, *comm3*) were used to  
98 inoculate a second series of flasks (Tier 2). Two milliliters of each sorghum-deconstructing  
99 microbiome (SDM) from Passage 4 (Day 56) was used to inoculate triplicate flasks containing 50  
100 ml M9TE (pH 6.5), and 0.5 g of either the parent forage sorghum or *bmr6* x *bmr12* stacked  
101 mutant<sup>24</sup>. Triplicate flasks along with a control were incubated at 50 °C, 200 rpm for 2 weeks. At  
102 each timepoint (Day 2, 5, 7, 9, 12, and 14), flasks were adjusted for evaporation, measured for pH,  
103 and sampled for nucleic acid extraction. Five hundred-microliter samples were centrifuged for 5  
104 min at 14,000 x g and pellets used for DNA/RNA co-extraction. After 14 days, 500 µl of media  
105 were centrifuged, and supernatant used for DNS assays and NIMS analysis. NIMS analysis was  
106 performed as described in detail elsewhere<sup>25</sup>. Briefly, a 2 µL aliquot of supernatant was transferred  
107 into a vial containing 6 µL of 100 mM glycine acetate, pH 1.2, 0.5 µL of a 5.0 mM aqueous  
108 solution of [*U*]-<sup>13</sup>C glucose, 2 µL of CH<sub>3</sub>CN, 1 µL of MeOH, 1 µL of solution probe (100 mM in  
109 1:1 (v/v) H<sub>2</sub>O:MeOH), and 0.1 µL of aniline. The mixture was incubated at room temperature for  
110 16 hours. NIMS analysis was performed using a Bruker UltrafleXtreme MALDI TOF/TOF mass  
111 spectrometer. In each case, 0.2 µL of the quenched reaction sample was spotted onto the NIMS  
112 surface and removed after 30 seconds. Signal intensities were identified for the ions of the tagging  
113 products and ~4000 laser shots were collected. Residual biomass was filtered through Miracloth  
114 and a subsample of 100 mg used for lignin quantification using the Acetyl Bromide Soluble Lignin  
115 (ABSL)<sup>26</sup> assay and the rest dried to determine dry weight. DNA from Day 14 was used for  
116 metagenome sequencing, while RNA from each sampling point submitted for metatranscriptome  
117 sequencing as described below.

118

119 *DNA/RNA Extraction for Metagenomics and Metatranscriptomics*

120 DNA and RNA were co-extracted from 500uL of SDM pellets as previously described<sup>27</sup> using a  
121 modified CTAB extraction buffer consisting of equal volumes of 0.5 M phosphate buffer (pH 8)  
122 in 1 M NaCl and 10% hexadecyltrimethylammonium bromide (CTAB) in 1 M NaCl. Briefly, tubes  
123 containing 500 µl of SDM pellet, 0.5 mL of modified CTAB extraction buffer, 50 µl of 0.1 M  
124 ammonium aluminum sulfate and 0.5 mL of phenol:chloroform:isoamyl alcohol (25:24:1) were  
125 bead-beaten at 5.5 m/s for 45 s in a FastPrep instrument (MP Biomedicals, Solon, OH, United  
126 States). Following bead-beating, tubes were centrifuged at 16,000 × g for 5 min at 4 °C. The  
127 supernatant was transferred to a new tube containing an equal volume of chloroform:isoamyl  
128 alcohol (24:1), vortexed, and centrifuged again. The supernatant was transferred into a new tube  
129 containing 1 ml of polyethylene glycol 6000 solution and 1 µl of linear acrylamide and incubated  
130 at room temperature for 2 h. Each sample was extracted a second time by adding 0.5 ml of modified  
131 CTAB extraction buffer to the original Lysing Matrix E tubes and repeating the steps from bead-  
132 beating onwards. The first and second extractions were centrifuged at 16,000 × g for 10 min at 4  
133 °C. The pellets (two per sample) were washed with 0.5 ml of cold 70% ethanol, dried, and  
134 combined in 50 µl of RNase-Free water. Purification was carried out using the AllPrep DNA/RNA  
135 Mini Kit (Qiagen, Valencia, CA, United States) according to manufacturer's instructions. DNA  
136 and RNA were eluted in 60 µl and 30 µl of RNase-Free water, respectively. Concentrations were  
137 measured by Qubit fluorimeter (Invitrogen, Carlsbad, CA, United States) and quality was assessed  
138 by BioAnalyzer (Agilent).

139

140

141



142 *Characterization of bacterial communities with amplicon sequencing*

143 Triplicated amplicon libraries were prepared using 3 ng of DNA per reaction and the primers 515F  
144 and 806R modified with Illumina sequencing adapters and barcodes. Libraries were pooled in  
145 equimolar concentrations and sequenced on the MiSeq platform using the Miseq Reagent kit v3.  
146 Sequences were demultiplexed based on their unique barcodes and trimmed to the same length.  
147 Sequences were dereplicated and sorted by decreasing abundance using USEARCH v11<sup>28</sup>. The  
148 dereplicated sequences were denoised, *de-novo* chimera filtered, and zero-radius OTUs (ZOTU)  
149 generated using unoise3 from USEARCH v11. Resulting ZOTUs, which are a form of amplicon  
150 sequence variants (ASVs), were taxonomically characterized against the Greengenes database  
151 gg\_16s\_13.5 using Sintax (USEARCH v11) with a cutoff of 0.8, and genus as the maximum  
152 taxonomic level. Total sequences were mapped against the ZOTUs at a 97% identity and an  
153 abundance table was generated that was subsequently transformed into a biom table. ZOTUs were  
154 aligned using Clustalw, and the alignment was used to generate a phylogenetic tree with IQ-TREE  
155 <sup>29</sup> using the model TIM3+F+I+G4 (identified using model finder) and ultrafast bootstrap  
156 approximation (UFBoot) with 1000 replicates. The abundance table, mapping file, and  
157 phylogenetic tree were imported to the R software using the Phyloseq package<sup>30</sup> (version 1.12.2).  
158 For community composition analyses (beta-diversity), data was VST-normalized using the  
159 DESeq2 package<sup>31</sup> (version 1.34.0) using a mean fit that was used to calculate a weighted Unifrac  
160 distance matrix. The obtained distance matrix was ordinated using multidimensional scaling in  
161 Phyloseq. The samples were categorized based on passage and its effect on data variation tested  
162 with Adonis (nonparametric permutation multivariate analysis of variance), performed with 1,000  
163 permutations.

164

165 *Metagenomic Sequencing and Analysis*

166 Twenty-one DNA samples, 3 from Tier 1 Day 56, and 18 from Tier 2 Day 14, were submitted to  
167 the Joint Genome Institute (JGI) for sequencing using Illumina Novaseq platform (150 bp x 2).  
168 Individual reads were filtered using JGI's standard metagenomic analysis pipeline (version 3.4.7  
169 from BBtools version 38.24), corrected using bbcms (version 38.34), and co-assembled using  
170 metaSPAdes<sup>32</sup> (version 3.13.0). Open Reading Frames were predicted from the assembled contigs  
171 using MetaGeneMark<sup>33</sup>. Protein domain annotations were predicted using the pfamA-30 and  
172 dbCAN-V8 Hidden Markov Model protein domain databases using an e-value of  $1 \times 10^{-5}$ . Protein  
173 categories of interest were screened against the National Center for Biotechnology Information  
174 database using BLASTp and dbCAN2's CAZy database for DIAMOND<sup>34</sup> (version 0.9.21.122)  
175 with an e-value  $1 \times 10^{-5}$ . The metagenome co-assembly was binned using MaxBin (version 2.2.5)  
176 with default parameters, yielding 103 Metagenome Assembled Genomes (MAGs). The most likely  
177 taxonomy was predicted using a custom script (getTaxon.pl), which searched the predicted  
178 proteins of the individual bins against the NCBI non-redundant (NR) database using DIAMOND  
179 (version 0.9.21.122) and processed the hits using the least common ancestor (LCA) algorithm  
180 proposed by MEGAN Community edition (version 6.11.0)<sup>35</sup>. Completeness and contamination  
181 rates for all MAGs were assessed using CheckM (version 1.0.12). MAGs (and associated genes)  
182 with at least 30% completeness and less than 10% contamination were retained for the rest of the  
183 analyses. Coverage information for the scaffolds of each MAG was extracted from the calculated  
184 coverage data TPM normalized data for each scaffold in the metagenome, and MAG abundances  
185 in each replicated sample were calculated as the average TPM coverage value over all the scaffolds  
186 in a MAG. The compositional variation of each enriched community was analyzed by quantifying  
187 their Local Contribution to Beta Diversity (LCBD) using the R package *adespatial* with the

188 Hellinger dissimilarity coefficient and  $p$ -value correction using the Holm method. A phylogenetic  
189 tree for the MAGs was reconstructed in KBase<sup>36</sup> based on universal genes defined by Cluster of  
190 Orthologous Groups using maximum likelihood. Average Nucleotide Identity between  
191 taxonomically related MAGs (genus level) was quantified also in KBase. Annotations for each of  
192 the MAGs are provided in Supplementary Data.

193

#### 194 *Metatranscriptomic Sequencing and Analysis*

195 Fifty-four RNA samples, from each of the treatments and time points of Tier 2 experiment were  
196 also submitted to JGI for metatranscriptomic sequencing using the Illumina Novaseq platform  
197 (150bp x 2). Sequenced samples represented triplicated RNA samples from adapted communities  
198 incubated with stacked mutant and WT sorghum. The filtered reads were assessed using FastQC  
199 (version 0.11.8) and mapped to the metagenome co-assembly using Bowtie2 (version 2.3.4.3).  
200 Gene counts were generated using Feature Counts (version 1.6.3) and normalized for both gene  
201 length and library size by transcripts per million (TPM), using a custom R script. For  
202 metatranscriptome ordination analyses a Bray-Curtis dissimilarity matrix was calculated using R's  
203 Vegan on the raw feature counts table that was first filtered to retain only those genes appearing  
204 in at least 5 samples (out of the total 54 samples) and mean count of 10. The resulting table was  
205 VST-normalized with DESeq2. The samples were categorized based on time (day), type of  
206 biomass (WT and SM), and categorical effects on data variation tested with Adonis (nonparametric  
207 permutation multivariate analysis of variance), performed with 1,000 permutations. Average  
208 transcriptome abundances per selected MAG were calculated on the TPM-normalized data and are  
209 available in Supplementary Data. For differential expression analyses, the feature count data was  
210 filtered using the parameters used for the transcriptome ordination analysis, retaining genes

211 appearing in at least 5 samples with a mean count of 10. Differential expression analyses were  
212 carried using DESeq2 using a parametric fit. The results filtered for a corrected  $p$ -value  $< 0.01$  and  
213 an absolute  $\log_2$ fold change  $> 1$ . Heatmaps showing normalized expression levels per relevant  
214 genes were calculated on the DESeq-2 VST-normalized data using R's *pheatmap* package, and  
215 rows arranged based on a Bray-Curtis dissimilarity matrix.

216

### 217 *Network reconstruction*

218 A network was constructed for the transcriptome data based on centred logratio transformed  
219 feature counts data<sup>37</sup>. Prior to normalization, the data was subsetted to include genes detected in at  
220 least 50% of the total number of samples. Network reconstruction was conducted with the  
221 Molecular Ecological Network Analyses pipeline (MENAP, <http://ieg4.rccc.ou.edu/mena/>) with  
222 the following settings: for missing data fill blanks with 0.01 if data have paired values; do not take  
223 logarithm as the data was already CLR normalized; use Spearman Correlation similarity matrix;  
224 calculate by decreasing cutoff from the top. Random Matrix Theory (RMT) was used to  
225 automatically identify the appropriate similarity threshold for network reconstruction<sup>38,39</sup>. The  
226 network was visualized in Cytoscape<sup>40</sup> (version 3.9.0) using Force-Directed graph drawing and  
227 colored based on the taxonomic identity of the included MAGs.

228

229 **Results:**

230 *Microbial community adaptation to grow on sorghum*

231 Green waste compost was used to inoculate three parallel microbiomes which were adapted to  
 232 grow on sorghum biomass as the sole carbon source for 56 days. Measurement of residual sorghum  
 233 biomass by Day 56 showed that *comm1* and *comm2* had a 40% reduction in biomass content and  
 234 *comm3* had a 57% biomass reduction (Supplementary Fig. 1). Amplicon sequencing demonstrated  
 235 that these microbiomes differentiated into individual communities (*comm1*, *comm2* and *comm3*).  
 236 Analysis of community composition showed that the individual microbiomes did not group over  
 237 time (PERMANOVA:  $df = 3$ ,  $F = 1.59$ ,  $p = 0.21$ ) but rather varied by community (PERMANOVA:  
 238  $df = 2$ ,  $F = 4.93$ ,  $p = 0.003$ ,  $r^2 = 52.3\%$ ) with each following a different trajectory (Fig. 1A). The  
 239 microbiomes *comm1* and *comm3* were more closely related to each other than *comm2*, which was

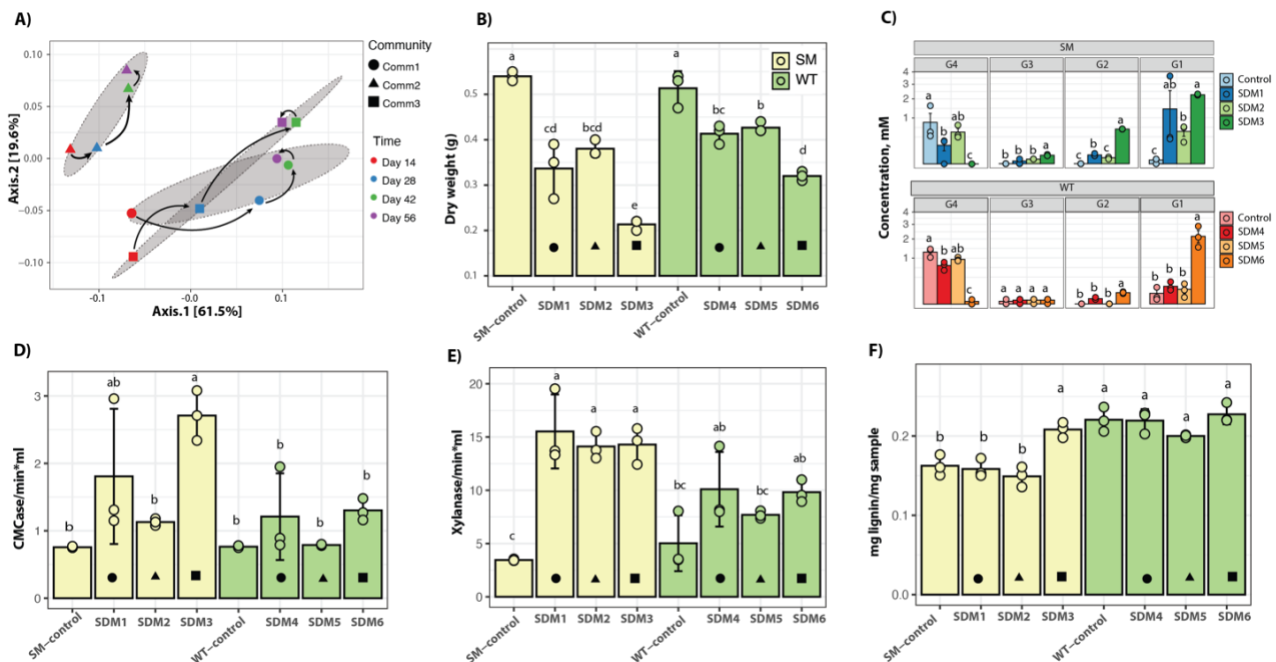

Fig 1. A) Ordination plot for bacterial communities growing on sorghum and analyzed using amplicon sequencing. B) Dry weight; C) NIMS results. Both correspond to end-point analyses after a 14-day incubation. D-E) DNS analysis for CMCase and xylanase activity of adapted communities inoculated to SM and WT sorghum. F) Lignin content from small-scale biomass analysis. The icons within the barplots indicate the Tier1 community used for inoculation of the Tier 2 experiment. Circle – *comm1*, triangle – *comm2*, square – *comm3*. Error bars indicate standard deviation ( $n = 3$ ). Bars labeled with the same letter are not significantly different (ANOVA and Tukey test;  $p > 0.05$ ).

240 separated at a considerable distance from the other microbiomes in the ordination plot. The  
241 trajectories of these microbiomes suggest that they possess distinct metabolic capabilities and that  
242 by Day 56 the community composition had stabilized.

243

#### 244 *Comparative deconstruction of sorghum*

245 The emergence of three distinct microbiomes from the initial green-waste compost inoculum  
246 provided an opportunity to compare the performance of parallel microbiomes with different  
247 community compositions. We compared the deconstructive abilities of these communities on  
248 sorghum varieties with different lignin content and monomeric compositions, to examine the effect  
249 of lignin on microbiome performance. Multiple mutants from the lignin biosynthetic pathway have  
250 been developed in sorghum, and the *bmr-6x12* double mutant was chosen for the parallel  
251 experiments<sup>24</sup>. This stacked mutant, in which mutations that affect both the lignin biosynthetic  
252 genes cinnamyl alcohol dehydrogenase (*bmr-6*) and caffeic acid O-methyltransferase (*bmr-12*),  
253 has lower lignin content and is more easily deconstructed compared to the native sorghum line<sup>41</sup>.  
254 Therefore, we compared the corresponding non-mutant sorghum hybrid, referred to as wild type  
255 (WT), and the *bmr-6x12* line, referred to as stacked mutant (SM). Microbiomes cultivated for 56  
256 days on forage sorghum were individually inoculated into triplicate cultures containing SM  
257 sorghum (SDM1-3) or the WT sorghum (SDM4-6) and cultivated for 14 days. Endpoint  
258 measurements of residual dry-weight biomass demonstrated that the communities cultivated on  
259 the SM sorghum exhibited the greatest biomass loss. Among the SM communities, SDM3 had a  
260 significantly higher average biomass reduction (75% vs control), while SDM6, inoculated using  
261 WT-sorghum, exhibited 54% biomass loss compared to the control. SDM3 (SM-treatment) and  
262 SDM6 (WT-treatment) are derived from the same *comm3*, and the levels of biomass consumption

263 showed that SDM3 was significantly higher than SDM6 (ANOVA and Tukey test,  $p < 0.01$ ). An  
264 analysis of cellotetraose hydrolysis showed that regardless of the type of biomass used as substrate  
265 (WT or SM), treatments inoculated with *comm3*-derived microbiome released the highest levels  
266 of glucose with SDM3 (SM sorghum) compared to SDM6 (WT sorghum) (SDM3: 2.25 mM,  $\sigma =$   
267 0.04; SDM6: 2.15 mM,  $\sigma = 0.6$ ) (Fig. 1C). Cellulase and xylanase activity were further  
268 investigated using DNS assays and showed the highest enzymatic activity in the *comm1* and  
269 *comm3*-derived treatments (SDM1/SDM4 and SDM3/SDM6, respectively). The results also  
270 indicated a higher cellulase and xylanase activity in the SM-sorghum treatments compared to WT-  
271 sorghum treatment (Fig. 1 D-E).

272 The changes in biomass composition were further analyzed by measuring relative lignin  
273 content compared to uninoculated controls. The residual biomass from the SM communities had a  
274 significantly lower lignin content than its WT-counterpart, consistent with the lower levels of  
275 lignin in the SM plants versus the WT plants (Fig. 1F). Calculations showed that although not  
276 statistically significant (ANOVA and Tukey test,  $p > 0.05$ ) all inoculated treatments had a lower  
277 lignin content than their controls, with the exception of the SDM3 treatment, which had an  
278 increased amount of lignin in the residual biomass that was statistically significant (Fig. 1F).

279

## 280 *Metagenomic analyses reveal metabolic potential for biomass transformation*

281 A total of 103 metagenome assembled genomes (MAGs) were reconstructed but only 66  
282 that had a completeness above 30% and contamination lower than 10% were considered for  
283 downstream analysis. These selected MAGs and their phylogenetic relationships based on  
284 universal genes are shown in Supplementary Figure 2. Figure 2A shows the shared and unique  
285 reconstructed MAGs in each of the Tier 2 samples and their community sources (*comm1*, *comm2*,



286 and *comm3*). Inspection of the clustering patterns showed that the composition of Tier 2 samples  
287 clustered according to their community sources, as also observed in amplicon-based analysis (Fig  
288 1A). The MAGs separated into five clusters (C1 – C5, Fig 2A). Cluster 1 (C1) represented the  
289 communities mostly unique to *comm2* derived samples (SDM2/SDM5) and included  
290 *Actinopolymorpha* bin102, *Bacillus* bin91, *Brevibacillus* bin76, 82, and 62 (Average Nucleotide  
291 Identity (ANI) = 76%), *Conexibacter* bin85 and 94 (ANI = 78%), *Geobacillus* bin98,  
292 *Illumatobacter* bin100, *Microbacterium* bin103, *Mycobacterium* bin99, *Paenibacillus* bin81,  
293 *Streptosporangium* bin58, *Thermobacillus* bin92 and 96 (ANI = 77%), and *Ureibacillus* bin93.  
294 Cluster 2 (C2) contained bacterial populations shared between *comm2* and *comm3*-derived samples  
295 (SDM2/SDM5 and SDM3/SDM6). Cluster 2 included *Actinopolymorpha* bin90, *Bacillus* bin63,  
296 *Brevibacillus* bin97, *Paenibacillus* bin101, *Salinispora* bin39 and 64 (ANI = 77%),  
297 *Solirubrobacterales* bin89, and *Thermocrispum* bin46. Cluster 3 (C3) represented the populations  
298 exclusively shared between *comm3* and *comm1*-derived samples (SDM6/SDM3, and  
299 SDM1/SDM4). Cluster 3 populations included *Conexibacter* bin16 and 24 (ANI = 79%),  
300 *Inquilingus* bin14, *Mycobacterium* bin18, *Pseudonocardia* bin23, *Salinispora* bin30 and 37 (ANI =  
301 77%). Cluster 4 (C4) represented the core populations among all samples and included  
302 *Actinopolymorpha* bin55, *Actinotalea* bin1 and 5 (ANI = 86%), *Aneuribacillus* bin28, *Bacillus*  
303 bin60, *Caldibacillus* bin56, *Conhella* bin15, *Dongia* bin26, *Filomicrobium* bin12 and 24 (ANI <  
304 70%), *Gemmanimonadetes* bin10, *Geobacillus* bin47, *Ornithimicrobium* bin31, *Paenibacillus*  
305 bin34, 35, 45, 67, and 69 (ANI = 76% – 78%), *Thermobacillus* bin17, 41, 43, 48, 51, and 53 (ANI  
306 = 77% – 89%), *Thermocrispum* bin11, and *Tuberibacillus* bin22. Finally, cluster 5 (C5) included  
307 some populations such as the *Rhodospirillales* bin9 and *Salinispora* bin32 which were unique to  
308 SDM1/SDM4, and *Thermobacillus* bin96 that was unique to SDM1/SDM6. Other populations in



309 this cluster included *Conhella* bin32, *Thermobacillus* bin49, *Filomicrobium* bin36,  
 310 *Caldakalibacillus* bin70, and *Paenibacillus* bin42 and 35 (ANI < 70%), all of which were shared  
 311 between SDM2/SDM5 and SDM1/SDM4.

312 According to the analysis of coverage distribution of the binned genomes (Fig. 2B), Tier 2  
 313 communities were dominated by the *Actinotalea* genome populations (*Actinotalea* bin1 and bin5).  
 314 *Actinotalea* bin1 contigs accounted for more than 70% of the total contig coverage in  
 315 SDM1/SDM3 and SMD4/SDM6, while *Actinotalea* bin5 accounted for 41% of the total contig  
 316 coverage in SDM2 and 24% in SDM5. Highly prevalent MAGs, also identified as part of the  
 317 cluster 4 (core populations), included populations of *Filomicrobium* bin12, Gemmanimonadetes

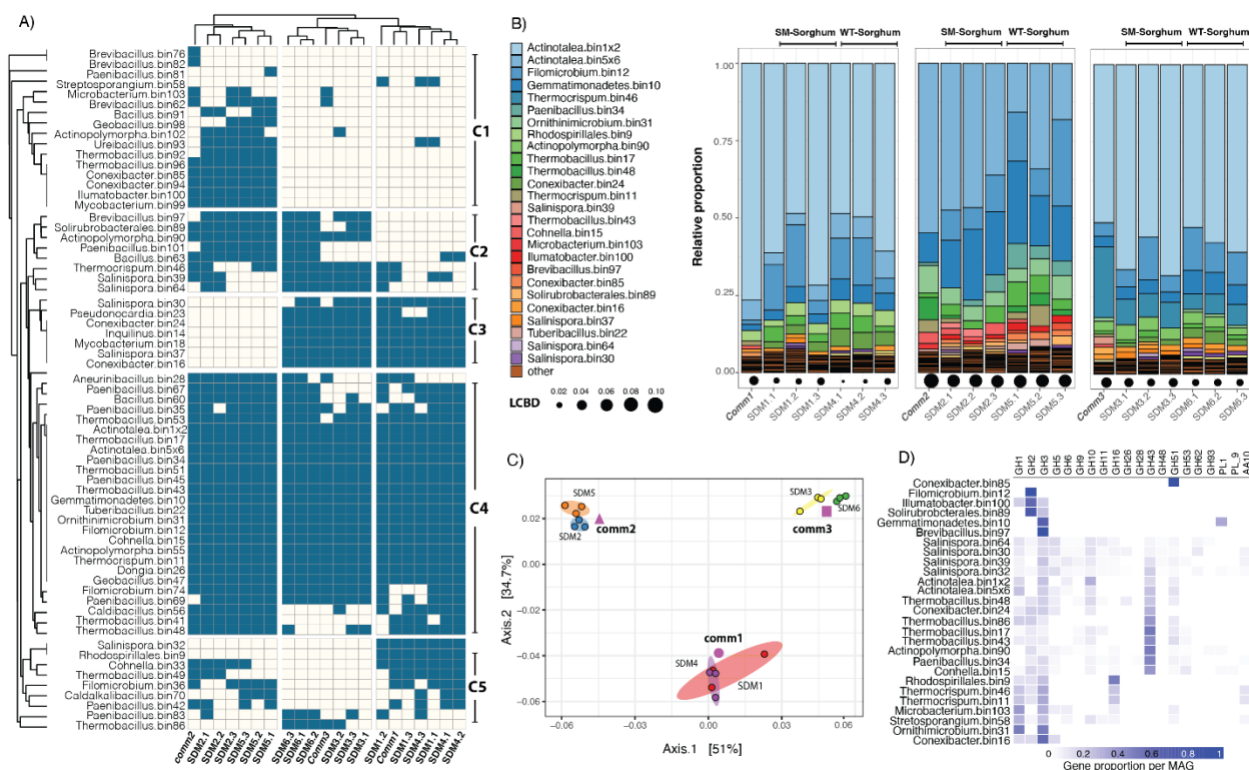

Fig 2. A) Community composition for Tier 2 adapted communities and their source Tier 1 source inoculum. Dendrograms were calculated based on a Jaccard distance matrix. B) Relative proportion of dominant communities calculated from TPM-normalized coverage data. Only populations with a relative proportion above 0.08 are shown in the figure. LCB = is local contribution to community dispersion calculated with the R package *adespatial*; C) Ordination plot depicting metagenome composition or the Tier 2 adapted communities and their corresponding Tier 1 source inoculum. The ellipses were calculated around barycenters with a confidence level of 0.99 using the *stat\_conf\_ellipse* function in *ggpubr* v.0.2.4. D) Gene proportion per MAG for selected GHs.

318 bin10, *Paenibacillus* bin34, *Ornithiummicrobium* bin31, *Thermobacillus* bin17, 43 and 48,  
319 *Thermocrispum* bin46 and 11, and *Cohnella* bin15. Other highly prevalent MAGs were  
320 *Brevibacillus* bin97 (C2), *Conexibacter* bin16, 24 (C3), 85 (C1), *Illumiatobacter* bin100 (C1),  
321 *Microbacterium* bin103 (C1), *Rhodospirillales* bin9 (C5), *Salinispora* bin37 (C3), 39 (C2), 64  
322 (C2), *Solirubrobacterales* bin89 (C2), and *Thermocrispum* bin46 (C2). Analysis of local  
323 contribution to beta diversity (LCBD) showed no significant variation (Holm corrected  $p$ -values >  
324 0.05) in the composition of the enriched communities when comparing the composition of the  
325 Tier2 enrichments and their Tier1 source inoculum (Fig. 2B).

326 An ordination analysis on the normalized coverage for the contigs of the selected bins (Fig  
327 2C) showed that the different samples clustered together based on their inoculum regardless of  
328 biomass type (SM or WT). Furthermore, a permutational analysis of variance showed that the type  
329 of inoculum (PERMANOVA:  $df = 2$ ,  $F = 54.9$ ,  $p = 9.9 \times 10^{-5}$ ) and type of biomass (PERMANOVA:  
330  $df = 1$ ,  $F = 5.8$ ,  $p = 9.9 \times 10^{-5}$ ) had significant effects on metagenomic clustering and explained  
331 84.2% and 4.4% of the observed patterns (Fig. 2C).

332 Prediction and annotation of genes identified within each MAG showed that the abundant  
333 *Actinotalea* bins contained some genes coding for putative glycoside hydrolases relevant for the  
334 degradation of polysaccharides. *Actinotalea* bin1 contained GH6 and GH10 genes; while  
335 *Actinotalea\_bin5* had GH5, 6, 10, 43, and 51 genes. On the other hand, other abundant MAGs such  
336 as *Actinopolymorpha* bin90, *Conhella* bin15, *Paenibacillus* bin34, *Thermobacillus* bin17 and  
337 bin48 contained more of the GHs possibly involved with pectin, hemicellulose, and cellulose  
338 degradation (Fig. 2D). Supplementary Figure 3 shows the distribution of relevant GHs among the  
339 selected MAGs.

340

341 *Sequential degradation of sorghum biomass follows two distinct trajectories*

342 The SDM1 and SDM3 treatments had the same most abundant population (*Actinotalea*  
 343 bin1) and the highest activities among the Tier 2 microbiomes. Therefore, we performed an in-  
 344 depth comparison of time-dependent gene expression patterns in these microbiomes to identify  
 345 similarities and differences in expression patterns, focusing on genes for deconstruction of plant  
 346 polymers. We also performed a comparison between SDM3 and SDM6 to see if the sorghum  
 347 substrate had any effect on gene expression patterns.

348 An ordination analysis of the metatranscriptome showed that the three selected enrichments  
 349 (SDM1, SDM3, and SDM6) followed two distinct trajectories (Fig. 3A). Similar to the  
 350 metagenome analysis, the metatranscriptomes clustered based on their initial inoculum and shifted  
 351 gradually over the course of 14 days. SDM3 and SDM6 followed a similar 2-week trajectory,  
 352 despite having different types of sorghum biomass. SDM1 followed a different trajectory from  
 353 SDM3 and SDM6, but also exhibited gradual shifts in overall activity, indicative of sequential

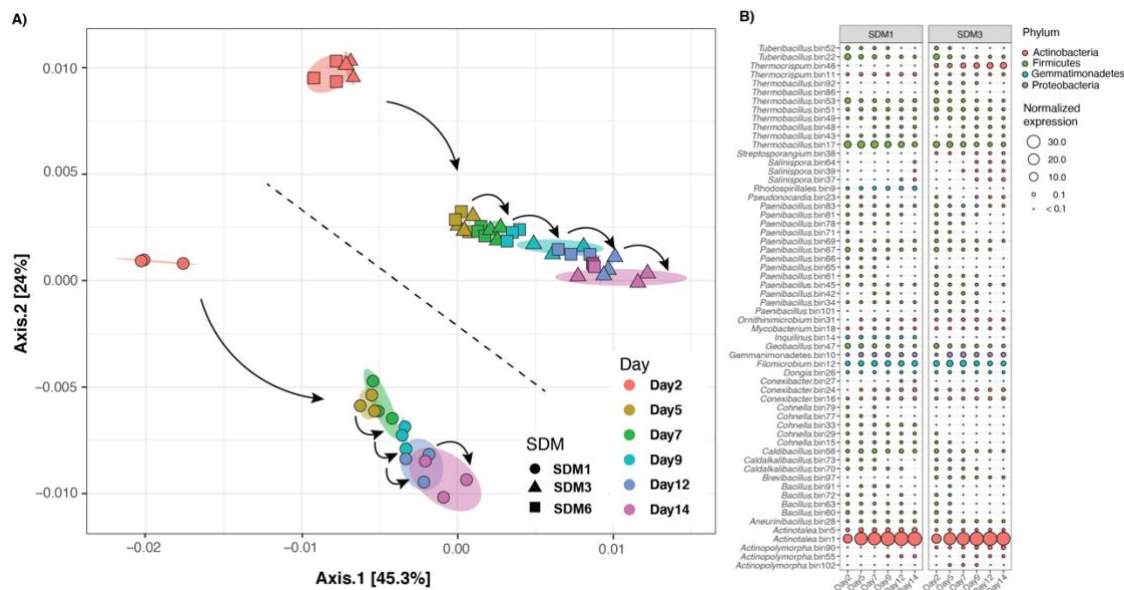

Fig. 3. A) Ordination biplot depicting the trajectory of metatranscriptomes for the adapted communities growing on SM and WT sorghum. The ellipses were calculated around barycenters with a confidence level of 0.99 using the *stat\_conf\_ellipse* function in ggpubr v.0.2.4 B) Average TPM-normalized transcriptome abundance per MAG over the 14-day incubation.

354 changes in community structure. A permutational analysis of variance further indicated that type  
355 of inoculum ( $Df = 2$ ,  $F=40.33$ ,  $p = 9.9 \times 10^{-5}$ ) and time ( $Df = 5$ ,  $F= 21.59$ ,  $p = 9.9 \times 10^{-5}$ ) each had a  
356 significant effect on metatranscriptome trajectory, explaining 40.3% and 21.5% of the observed  
357 variation, respectively (Fig. 3A). The analysis of variance also indicated that the type of biomass  
358 (WT and SM) did not have a significant effect on metatranscriptome trajectory. Based on these  
359 results, we chose to focus our analyses on the characterization of SDM1 and SDM3.

360 An analysis of the normalized abundance of transcriptomes for each reconstructed MAG  
361 indicated that the *Actinotalea*-bin1 was the most active organism in the enrichments across  
362 sampling times (Fig. 3B). Other highly active bins included *Thermobacillus* bin17, *Filomicrobium*  
363 bin12, *Thermocrispum* bin46, *Gemmatimonadetes* bin10, *Thermobacillus* bin53 and 51,  
364 *Tuberibacillus* bin22, *Geobacillus* bin47. Genome bins that were more active in SDM1 included  
365 *Actinotalea* bin5, *Rhodospirillales* bin9, and *Inquilinus* bin14, while *Actinopolymorpha* bin90,  
366 *Paenibacillus* bin42, and *Thermobacillus* bin49 were more active in SDM3 (Fig. 3B).

367 Random Matrix Theory (RMT)-based network analysis was performed to define putative  
368 interactions among the networked populations and to further explore transcriptome dynamics<sup>38,39</sup>.  
369 Figure 4A depicts the reconstructed network based on metatranscriptome expression profiles. Each  
370 MAG in the network is colored showing that bacterial populations identified as highly abundant  
371 in the metagenome and with high expression levels in the metatranscriptome formed highly  
372 connected clusters within the network. The reconstructed network (Fig. 4A) consisted of 22,887  
373 nodes (networked genes) and 5,018,619 links with correlation values between 0.9 – 1.0, and 164  
374 large modules (>10 connected nodes). Cluster isolation by reconstructed MAG with linked  
375 neighbors representing co-expression patterns defined potential pairs of interacting bacterial  
376 populations. These patterns showed that populations represented by *Actinotalea* bin1, *Actinotalea*

377 bin5, *Filomicrobium* bin12, and *Gemmatimonadetes* bin10 were highly interconnected and likely  
378 interacted directly with each other in the metatranscriptomes (Fig. 4B). Because of their  
379 conservation in all the microbiomes, high level of abundance and activity (Fig. 2B and 3B), and  
380 the direct interconnections between these four MAGs (Fig. 4B) we defined these bins as key  
381 populations within the adapted communities. Mapping of differential expression (log2fold change  
382 for genes with  $p < 0.01$ ) onto the network showed that *Actinotalea* bin5 was significantly more  
383 active in SDM1 during the 14-day incubation (Fig. 4B). We also observed that *Actinotalea* bin1,  
384 *Filomicrobium* bin12 and *Gemmatimonadetes* bin10 were more active in SDM3 than in SDM1  
385 from Day 5 to Day 9. The significantly higher activity of these three central bins remained through  
386 the 14-day incubation for *Actinotalea* bin1 and declined first for *Gemmatimonadetes* bin10 by  
387 Day 12 and then for *Filomicrobium* bin12 by Day 14 (Fig. 4C).

388 One-to-one putative interactions between these four central MAGs with other members of  
389 the adapted community were also predicted from the network (Fig. 4A and B). *Actinotalea* bin5  
390 and *Filomicrobium* bin12 had direct connections with a larger number of MAGs than *Actinotalea*  
391 bin1 and *Gemmatimonadetes* bin10. Populations directly linked with *Actinotalea* bin5 included  
392 *Thermocrispum* bin11, *Conhella* bin29, *Salinispora* bin37, *Streptosporangium* bin38,  
393 *Thermobacillus* bin50, *Thermobacillus* bin53, *Caldibacillus* bin56. *Filomicrobium* bin12 on the  
394 other hand, had direct links with *Thermobacillus* bin17, *Ornithimicrobium* bin31, *Paenibacillus*  
395 bin45, *Thermobacillus* bin51, *Paenibacillus* bin61, *Filomicrobium* bin74, *Paenibacillus* bin83,  
396 and *Filomicrobium* bin88. Aside from their connections with the other central MAGs, *Actinotalea*  
397 bin1 was found as linked with *Conexibacter* populations bin16 and 24, while *Gemmatimonadetes*  
398 bin10 was linked to *Thermobacillus* bin53 (also connected with *Actinotalea* bin5) and with  
399 *Caldalkalibacillus* bin73.



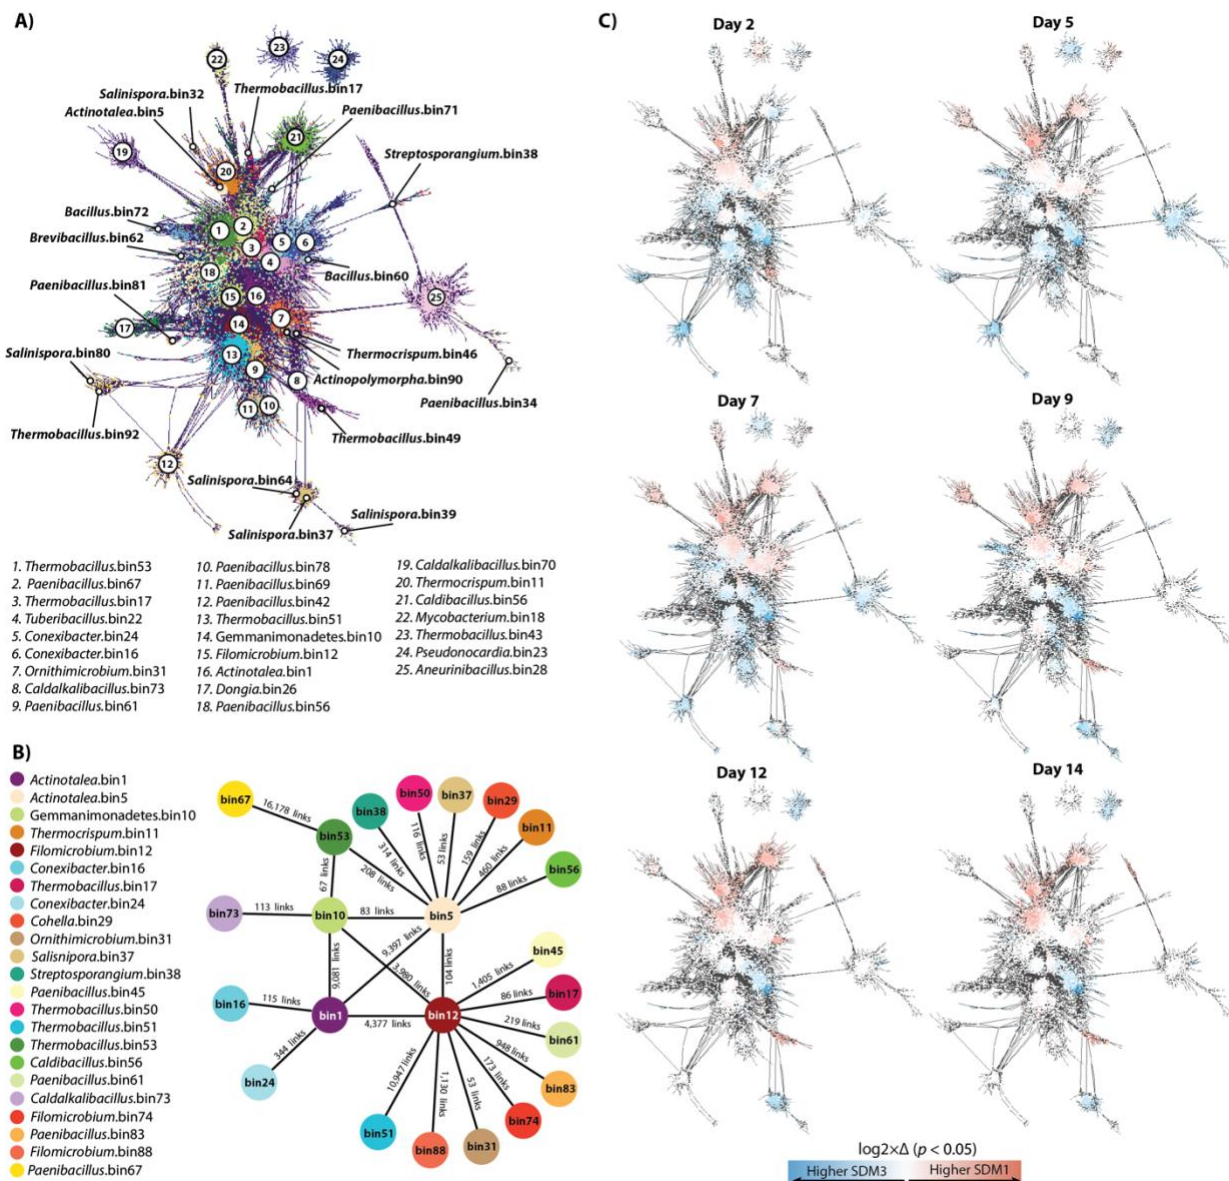

Fig. 4. A) RMT-based network reconstructed based on the 14-day metatranscriptome profiles of SDM1 and SDM3 samples. Only significant links with a correlation above 0.9 were retained in the network. B) Illustration of putative population interactions derived from the RMT-network. MAGs connected to the central four MAGs were retained only if connecting by 50 or more links (arbitrary value). C) Differential expression patterns for genes with a log<sub>2</sub>-fold change higher than 1 and lower than -1 with a  $p$ -value < 0.01.

400 We also explored the network associations of MAGs that represented likely key  
401 contributors to the process of lignocellulose degradation given their genetic makeup  
402 (Supplementary Fig. 1) and high expression levels (Fig. 3B). *Paenibacillus* bin67 was another  
403 MAG of interest as it encodes for GHs potentially contributing to the degradation of pectin (GH2,

404 GH43) and hemicellulose (GH10, GH51). *Paenibacillus* bin67 was highly connected with  
405 *Thermobacillus* bin53, which contained genes encoding for a wide array of putative GHs including  
406 those from families 2, 5, 10, 16, 28, 43, 51, 53, the carbohydrate esterase CE8, and PL1 and PL9  
407 (Supplementary Fig. 2). *Thermobacillus* bin53 was also linked to with *Actinotalea* bin1 and bin5,  
408 likely acting as a connection between the dominant *Actinotalea* populations and the rest of the  
409 communities.

410 Another likely prominent group in the process of polysaccharide degradation was the  
411 *Salinispora* populations. Three of these MAGs (bin37, 39, and 64) were detected forming a  
412 discrete cluster showing high levels of transcriptomic activity in SDM3 from Day 7 to Day 14  
413 (Fig. 4A and 4B). Among these three MAGs, *Salinispora* bin39 and 64 contained a wide arsenal  
414 of glycoside hydrolases including GH2, GH5, GH6, GH9, GH10, GH11, GH16, GH43, GH48,  
415 GH51, GH53, and PL9 (only bin39); and GH62 and GH93 (only in bin64) (Supplementary Fig.  
416 2).

417 Detailed exploration of the normalized transcriptome expression profiles indicated that  
418 degradation of the primary cell wall was likely initiated by the activity of microorganisms  
419 producing enzymes for pectin degradation in a process that was significantly higher in SDM1 than  
420 in SDM3 (Wilcox pairwise comparison,  $p < 0.01$ ) and that continued steadily over the 14 days of  
421 incubation (Fig 5A). Pectin-degrading expression profiles were separated into four main clusters  
422 (Fig. 5D). Cluster 1 (C1) included pectin-degrading genes that were significantly highly expressed  
423 in SDM1 and SDM3 ( $p < 0.01$ ,  $\log_2\text{fold} > 1$ ); C2 and C4 composed by genes highly expressed in  
424 SDM3; and C3 genes significantly highly expressed in SDM1. Based on the observed patterns of  
425 expression in these clusters, pectin degradation in both treatments was driven by the high levels of  
426 expression of GH43 and GH78 from *Actinotalea* bin1 and *Filomicrobium* bin12, respectively. Two

427 main populations of Firmicutes controlled pectin degradation at the start of the incubation in  
428 SDM1 including *Thermobacillus* bin53 and *Paenibacillus* bin67 through the expression of most  
429 of the genes shown in C1 and C3 at significantly higher levels than in SDM3 ( $p < 0.01$ , log2fold  
430  $> 1$ ). Other contributors to the process of pectin degradation in SDM3 were *Thermobacillus* bin51  
431 and Rhodospirillales bin9, that expressed GH2 and GH43 (in bin51 only) through the whole  
432 incubation. Initial drivers of pectin degradation in SDM3 included *Thermobacillus* bin51 and  
433 *Filomicrobium* bin12 (C2) and *Salinispora* bin39 (C4) expressing GH78, and *Paenibacillus* bin67  
434 (C2) expressing GH43. *Actinopolymorpha* bin90 (C4) was also among the main contributors to  
435 pectin degradation in SDM3 through the expression ( $p < 0.01$ , log2fold  $> 1$ ) of GH2, GH43, GH78,  
436 and GH93 together with *Thermocrisum* bin46 expressing PL9 and GH2.

437         Hemicellulose deconstruction gene expression dynamics resembled the pectin dynamics as  
438 indicated by the higher levels of hemicellulose-deconstructing gene expression in SDM1 than in  
439 SDM3 (Fig. 5B). It is likely that *Actinotalea* bin1, the most abundant bacterial population, initiated  
440 and maintained the process of hemicellulose deconstruction in both treatments given the high  
441 expression levels of the GHs from the families 10, 51 and 16 from this MAG (C1, Fig. 5E) together  
442 with the GH10 from *Paenibacillus* bin67. Other pioneering populations in the hemicellulose  
443 deconstruction process were *Thermobacillus* bin17 (C3), 51, 53 (C1 and C3), and *Paenibacillus*  
444 bin67 (Fig. 5E, cluster 1) through the expression of GHs from the families 10, 11, 16, 26, and 51  
445 whose expression was significantly higher in SDM1 than in SDM3 ( $p < 0.01$ , log2fold  $> 1$ ). The  
446 expression of these GHs was higher during Day 2 and then declined but continued through the  
447 incubation period. GHs that contributed to the high hemicellulose degrading activity in SDM1  
448 were the GHs 10 and 16 from *Actinotalea* bin5 and *Rhodospirillales* bin9, whose activity was  
449 detected since the beginning of the incubation and increased over time up to Day 14 (C1, Fig. 5E).



450 Significantly highly expressed GHs in SDM3 are shown in Fig. 3E cluster 2, and included GH10,  
 451 11, 16, 51, 53, and 67 from *Actinopolymorpha* bin90, *Mycobacterium* bin18, *Thermocrispum*  
 452 bin46, and *Paenibacillus* bin42. The expression of these GHs increased over time with those from  
 453 *Actinopolymorpha* bin90, *Mycobacterium* bin18, and *Thermocrispum* bin46 reaching higher levels  
 454 from Day 9 to Day 14 likely indicating the critical roles of these populations for the progression  
 455 of biomass decomposition in SDM3.

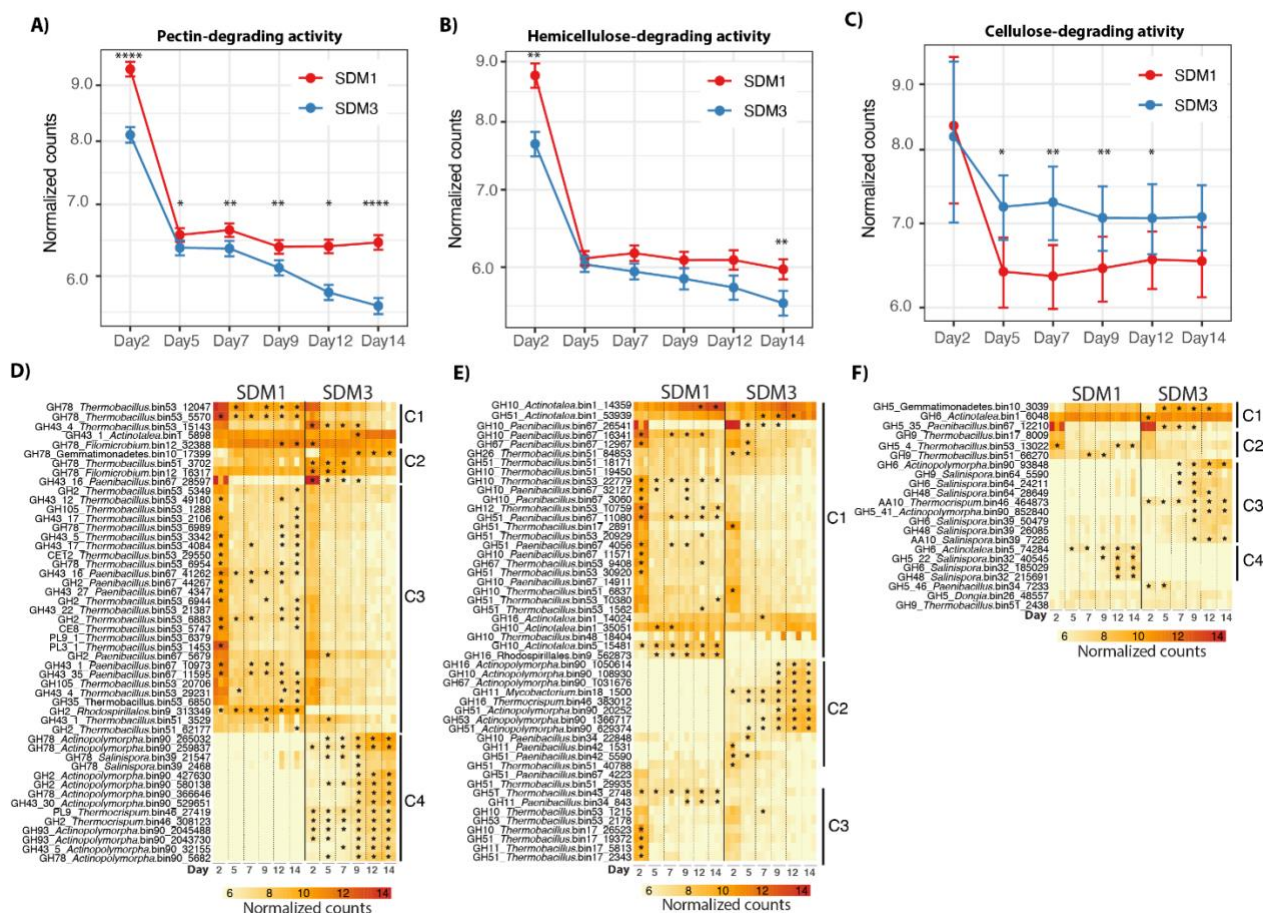

456  
 457 Fig. 5. Top panel shows the average trajectories of expression for each of the categories, A) pectin, B) hemicellulose,  
 458 C) cellulose. Bottom panels depict the different groups of lignocellulose degrading bacterial populations and  
 459 corresponding gene expression patterns, D) pectin, E) hemicellulose, F) cellulose. Stars indicate the time points at  
 460 which gene expression was significantly higher than in the opposite treatment ( $p < 0.01$ ,  $\log_2\text{fold} > 1$ ). GH43 were  
 461 classified as pectin/degrading enzymes, though this family also cleaves arabinoxylan bonds in hemicellulose<sup>42</sup>.

462  
463 In contrast to pectin and hemicellulose, the expression of genes related to cellulose  
464 deconstruction was overall higher in SDM3 than in SDM1 (Fig. 5C). Expression patterns showed  
465 that the cellulose deconstruction commenced in both treatments (SDM1/SDM3) by the activity of  
466 *Actinotalea* bin1, *Gemmatimonadetes* bin10, *Paenibacillus* bin67, *Thermobacillus* bin53, and  
467 *Thermobacillus* bin51 expressing GH5 and GH9 (C1, Fig. 5F). In SDM3, the cellulose degradation  
468 process was complemented by the significantly higher activity ( $p < 0.01$ ,  $\log_2\text{fold} > 1$ ) of  
469 *Actinopolymorpha* bin90 expressing a GH5 and a GH9, *Thermocrisium* bin46 and *Salinispora*  
470 bin39 expressing an AA10, together with *Salinispora* bin64 expressing GH6, 9 and 48, all of which  
471 increased over time (C3, Fig. 5F). In SDM1, *Salinispora* bin32 was a key contributor to cellulose  
472 degradation through the expression of a GH5, 6 and 48 that reached its highest from Day 9 to Day  
473 12. Other bacterial populations likely contributing to cellulosic activity were *Paenibacillus* bin34,  
474 *Dongia* bin26 (C5) and *Thermobacillus* bin17 (C2) through the expression of GH5 and GH9.

475 In comparison to bacterial polysaccharide deconstruction, bacterial lignin deconstruction  
476 is less understood<sup>43</sup>. Inspection of the metagenome and metatranscriptome identified a protein  
477 annotated as a multi-copper oxidase in the *Gemmatimonadetes* bin10. A homolog of this protein  
478 in a closely related thermophilic *Gemmatimonadetes* population was identified by proteomics as  
479 one of the most abundant proteins in the supernatant of bacterial consortium growing on  
480 switchgrass at 60 °C<sup>44</sup>. In addition, a homologous Cu-containing protein was identified in cultures  
481 of *Thermobifida fusca* growing on sugarcane bagasse<sup>45</sup>. This Cu-protein improved the  
482 polysaccharide hydrolysis of *T. fusca* glycoside hydrolases and improved the deconstruction  
483 efficiency of an engineered cellulosome on wheat straw when it was incorporated as a heterologous  
484 protein<sup>46</sup>. In the sorghum cultures, the *Gemmatimonadetes* bin10 multi-copper oxidase expression  
485 was found to be significantly higher in SDM3 than in SDM1 from Day 5 to Day 7, reaching similar

486 levels at Day 9 (Figure 6). In addition, expression of a complete pathway for aromatic catabolism  
 487 from 4-hydroxybenzoate transformation to protocatechuate and its conversion to succinyl-CoA  
 488 and acetyl-CoA via the beta-ketoadipate pathway was observed in the *Filomicrobium bin12*. This  
 489 pathway was detected at significantly higher levels in SDM3 compared to SDM1 from Day 2 to  
 490 Day 7 (Fig. 6).

491

492

493

494

495

496

497

498

499

500

501

502

503

504

505

506

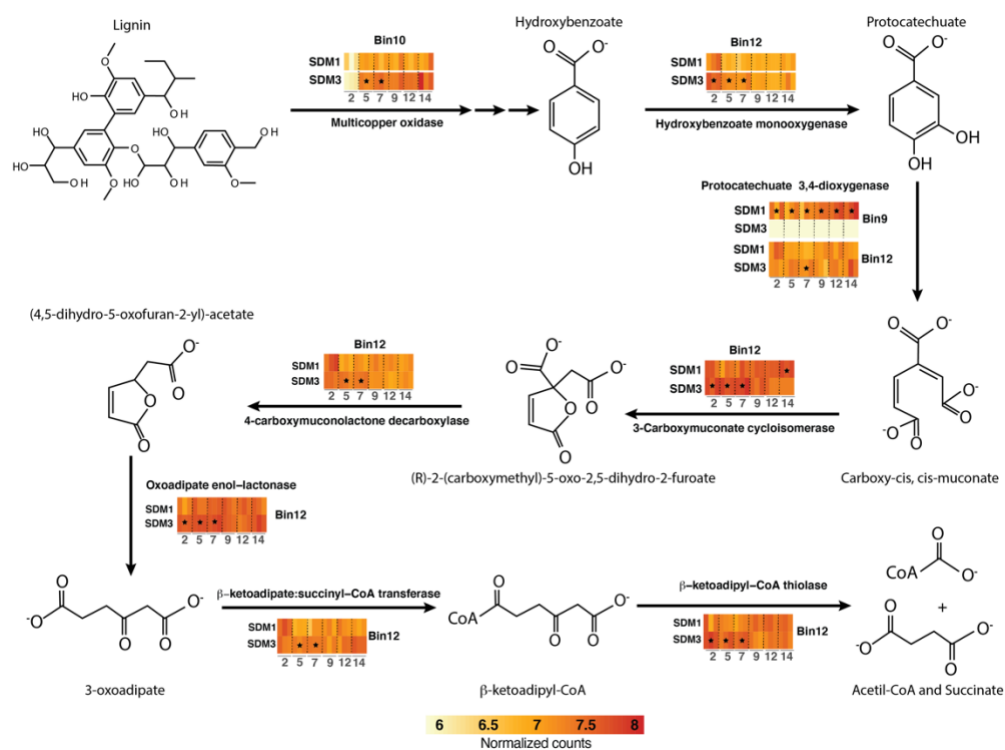

Fig. 6. Schematic representation of the expression patterns for aromatic-degrading genes. The heatmaps are colored based on normalized counts for the targeted genes. Stars indicate the time points at which gene expression was significantly higher than in the opposite treatment ( $p < 0.01$ ,  $\log_2\text{fold} > 1$ ).

## 507 **Discussion**

508 The two-tier cultivation of compost-derived microbiomes on sorghum led to the establishment of  
509 microbiomes for which community structure and performance could be assessed. Initial  
510 inoculation and growth on biomass sorghum provided distinct microbiomes (*comm 1-3*) that  
511 traversed independent trajectories during two months of adaptation (Fig. 1A). The development  
512 of distinctive microbiomes echoes parallel cultivation of microbiomes from *Sarracenia purpurea*  
513 pitcher plants grown on ground crickets<sup>47</sup>. The community structures of these parallel microbiomes  
514 also diverged during adaptation and the pitcher plant-derived consortia had variable activities in  
515 chitin deconstruction. The second-tier growth using the *comm 1-3* microbiomes as inoculum for  
516 growth on wild-type (SDM4-SDM6) and lignin-reduced sorghum varieties (SDM1-SDM3)  
517 demonstrated that the structure and deconstructive activities of these microbiomes are  
518 reproducible. This observation suggests that after adaptation the community structures are  
519 maintained, allowing detailed comparisons between microbiomes that are statistically robust.  
520 Furthermore, analysis of variance between our compost-enriched microbiomes grown on wild-  
521 type sorghum (SDM6) compared to the *bmr-6x12* mutant (SDM3) provides persuasive evidence  
522 that community structure, rather than plant cell wall structure, defines the trajectory of  
523 deconstruction. The increased digestibility of the *bmr-6x12* mutant is consistent with its reduced  
524 lignin content and resulting lower recalcitrance<sup>24,41</sup>.

525 Genome-resolved metagenomics demonstrated the most abundant populations in the  
526 microbiomes were two closely related *Actinotalea* populations. The most abundant *Actinotalea*  
527 population in the *comm1* and *comm3*-derived microbiomes (*Actinotalea* bin1) possessed fewer  
528 deconstructive enzymes than the most abundant *Actinotalea* population (*Actinotalea* bin5) in  
529 *comm2*; however, the performance of the *comm2*-derived microbiomes, as measured by biomass

530 loss, cellulase/xylanase activity and lignin remaining in the residual biomass was generally lower  
531 compared to the *comm1* and *comm3*-derived microbiomes. The presence of *Gemmatimonadetes*  
532 bin10 and *Filomicrobium* bin12 in *comm1-3* and their daughter communities suggested their  
533 prominent role in biomass deconstruction. This hypothesis was confirmed by both network  
534 analysis of gene expression, which demonstrated that gene expression in these populations were  
535 correlated, and functional analysis, which demonstrated that the *Gemmatimonadetes* and  
536 *Filomicrobium* populations were involved in lignin deconstruction, an essential function in the  
537 deconstruction of the secondary plant cell wall. In addition, *Paenibacillus* bin67 and  
538 *Thermobacillus* bin17, bin51 and bin53 are broadly distributed and demonstrated high, correlated  
539 expression of pectinases and hemicellulases, especially early in the two-week cultivation, that is  
540 consistent with deconstruction of the primary cell wall. The contribution of these lower abundance  
541 populations to cell wall deconstruction is a phenomenon which has been observed in native  
542 microbiomes that deconstruct complex polysaccharide substrates like the human gut<sup>48</sup>.

543         The microbiomes derived from *comm1* and *comm3* growing on the *bmr-6x12* sorghum  
544 mutant that were dominated by *Actinotalea* bin1 provided an opportunity to link the community  
545 performance, as measured by biomass loss and enzymatic activity, to detailed gene expression  
546 dynamics. Focusing on the genes for biomass deconstruction, the *comm1*-derived microbiome  
547 (SDM1), had higher levels of expression of pectin and hemicellulose deconstructing enzymes, with  
548 the peak of gene expression activity occurring during the initial time (Day 2) and the majority of  
549 genes being expressed by the *Firmicutes*. We interpret this pattern as initial deconstruction of the  
550 primary cell wall, which continues throughout the two-week cultivation. At Day 5, there was  
551 increased expression of the multi-copper oxidase from the *Gemmatimonadetes* bin10 population,  
552 consistent with the commencement of deconstruction of the secondary cell wall, and the relative

553 expression level was higher in SDM3, the more active set of cultures. This increased expression  
554 was also mirrored in the aromatic catabolic genes expressed by *Filomicrobium* bin10, the majority  
555 of which were expressed from Day 2 to Day 7 at higher levels in SDM3. The cellulase genes,  
556 especially GH6, GH9, GH48 and AA10, are expressed by *Actinobacteria* (*Salinospora*,  
557 *Actinopolymopha*, *Thermocripsum*) later in the cultivation (Day 9 to Day 14) and at higher levels  
558 in SDM3. SDM1 and SDM3 form two separate clusters of cellulase expression, indicating that  
559 these activities are distinct between the two communities. This distinction is also seen in the  
560 network analysis, where *Salinospora* bin32 (SDM1) and *Salinopsora* bin64 (SDM3) are peripheral  
561 and divergent members of the network, suggesting the response to cellulose has less overlap  
562 between the two communities compared to the other plant polymers. The increases in gene  
563 expression are consistent with biochemical measurements which show SDM3 has higher cellulase  
564 activity. The observation of higher cellulase activity, which arises from the actinobacterial  
565 populations, may explain the increased biomass deconstruction by SDM3 communities. The  
566 overall pattern of community dynamics, with *Firmicutes* being active at early timepoints and  
567 *Actinobacteria* active and later timepoints, mirrors the dynamics observed during composting<sup>49</sup>.

568 The work described here highlights the importance of founder effects in defining the  
569 composition and trajectory of microbiomes, and reinforces the observation that subtle differences  
570 in community composition and the genomic content of strains may lead to significant differences  
571 in community performance<sup>50</sup>. These considerations should be accounted for in using microbiomes  
572 for biotechnology and building synthetic microbiomes<sup>51</sup>.

573

574

575



576 *Data availability*

577 Metagenomic and metatranscriptomic sequencing data can be accessed at the Joint Genome  
578 Institute Genome Portal (<http://genome.jgi.doe.gov/>) under Proposal ID: 503813 (Alteration of  
579 lignin biosynthetic pathways in sorghum enhances its deconstruction by adapted microbial  
580 consortia).

581

582 *Acknowledgments*

583 This work was performed as part of the DOE Joint BioEnergy Institute (<http://www.jbei.org>),  
584 supported by the US DOE, Office of Science, Office of Biological and Environmental Research,  
585 through contract DE-AC02-05CH11231 between Lawrence Berkeley National Laboratory and the  
586 US DOE. Metagenomic and metatranscriptomic sequencing was conducted by the Joint Genome  
587 Institute, which is supported by the Office of Science of the US DOE under contract no. DE-AC02-  
588 05CH11231. The forage sorghum biomass was provided by Scott Sattler at USDA Agricultural  
589 Research Station in Lincoln, Nebraska.

590

591 *Contributions*

592 S.W.S and J.C.-N. designed experiments; L.M.T., M.A., K.D., Y.G., B.G.R. and A.E. performed  
593 experiments; L.M.T., M.A., Y.-W.W, N.X., J.C.-N. performed data analysis; C.L., J.C.M., P.A.,  
594 T.R.N., H.S., B.A.S. supervised research; L.M.T., M.A., J.C.-N. and S.W.S wrote manuscript. All  
595 authors approved the final manuscript.

596

597 *Competing interests*

598  
599 The authors declare no competing financial interests.

600

## 601 **References**

- 602 1. Cosgrove, D. J. & Jarvis, M. C. Comparative structure and biomechanics of plant primary  
603 and secondary cell walls. *Front. Plant Sci.* **3**, 204 (2012).
- 604 2. Peralta-Yahya, P. P., Zhang, F., Del Cardayre, S. B. & Keasling, J. D. Microbial  
605 engineering for the production of advanced biofuels. *Nature* **488**, 320–328 (2012).
- 606 3. Stephanopoulos, G. Challenges in engineering microbes for biofuels production. *Science*  
607 (80- ). **315**, 801–804 (2007).
- 608 4. Kerr, R. A. Global warming is changing the world. *Science (80- )*. **316**, 188–190 (2007).
- 609 5. Arfi, Y. *et al.* Characterization of salt-adapted secreted lignocellulolytic enzymes from the  
610 mangrove fungus *Pestalotiopsis* sp. *Nat. Commun.* **4**, 1–9 (2013).
- 611 6. Straub, C. T. *et al.* Quantitative fermentation of unpretreated transgenic poplar by  
612 *Caldicellulosiruptor bescii*. *Nat. Commun.* **10**, 1–6 (2019).
- 613 7. Blifernez-Klassen, O. *et al.* Cellulose degradation and assimilation by the unicellular  
614 phototrophic eukaryote *Chlamydomonas reinhardtii*. *Nat. Commun.* **3**, 1–9 (2012).
- 615 8. Eibinger, M., Sattelkow, J., Ganner, T., Plank, H. & Nidetzky, B. Single-molecule study  
616 of oxidative enzymatic deconstruction of cellulose. *Nat. Commun.* **8**, 1–7 (2017).
- 617 9. Himmel, M. E. *et al.* Biomass recalcitrance: Engineering plants and enzymes for biofuels  
618 production. *Science (80- )*. **315**, 804–807 (2007).
- 619 10. Tan, T. C. *et al.* Structural basis for cellobiose dehydrogenase action during oxidative  
620 cellulose degradation. *Nat. Commun.* **6**, 1–11 (2015).
- 621 11. Ceja-Navarro, J. A. *et al.* Gut anatomical properties and microbial functional assembly  
622 promote lignocellulose deconstruction and colony subsistence of a wood-feeding beetle.  
623 *Nat. Microbiol.* **4**, (2019).



- 624 12. Gharechahi, J. *et al.* Metagenomic analysis reveals a dynamic microbiome with diversified  
625 adaptive functions to utilize high lignocellulosic forages in the cattle rumen. *ISME J.* **15**,  
626 1108–1120 (2021).
- 627 13. López-González, J. A. *et al.* Enzymatic characterization of microbial isolates from  
628 lignocellulose waste composting: Chronological evolution. *J. Environ. Manage.* **145**, 137–  
629 146 (2014).
- 630 14. Romero Victorica, M. *et al.* Neotropical termite microbiomes as sources of novel plant  
631 cell wall degrading enzymes. *Sci. Rep.* **10**, 3864 (2020).
- 632 15. Silva, P. C. *et al.* A novel d-xylose isomerase from the gut of the wood feeding beetle  
633 *Odontotaenius disjunctus* efficiently expressed in *Saccharomyces cerevisiae*. *Sci. Rep.* **11**,  
634 4766 (2021).
- 635 16. Jiménez, D. J. *et al.* Ecological Insights into the Dynamics of Plant Biomass-Degrading  
636 Microbial Consortia. *Trends Microbiol.* **25**, 788–796 (2017).
- 637 17. Kolinko, S. *et al.* A bacterial pioneer produces cellulase complexes that persist through  
638 community succession. *Nat. Microbiol.* **3**, 99–107 (2018).
- 639 18. Peng, X. *et al.* Genomic and functional analyses of fungal and bacterial consortia that  
640 enable lignocellulose breakdown in goat gut microbiomes. *Nat. Microbiol.* **6**, 499–511  
641 (2021).
- 642 19. Santos, J. *et al.* From nature to the laboratory: the impact of founder effects on adaptation.  
643 *J. Evol. Biol.* **25**, 2607–2622 (2012).
- 644 20. Eudes, A. *et al.* SbCOMT (Bmr12) is involved in the biosynthesis of triclin-lignin in  
645 sorghum. *PLoS One* **12**, (2017).
- 646 21. Eichorst, S. A. *et al.* Community dynamics of cellulose-adapted thermophilic bacterial

- 647 consortia. *Environ. Microbiol.* **15**, 2573–2587 (2013).
- 648 22. King, B. C., Donnelly, M. K., Bergstrom, G. C., Walker, L. P. & Gibson, D. M. An  
649 optimized microplate assay system for quantitative evaluation of plant cell wall-degrading  
650 enzyme activity of fungal culture extracts. *Biotechnol. Bioeng.* **102**, 1033–1044 (2009).
- 651 23. Ing, N. *et al.* A multiplexed nanostructure-initiator mass spectrometry (NIMS) assay for  
652 simultaneously detecting glycosyl hydrolase and lignin modifying enzyme activities. *Sci.*  
653 *Rep.* **11**, 1–9 (2021).
- 654 24. Sattler, S. E., Funnell-Harris, D. L. & Pedersen, J. F. Efficacy of Singular and Stacked  
655 brown midrib 6 and 12 in the Modification of Lignocellulose and Grain Chemistry. *J.*  
656 *Agric. Food Chem.* **58**, 3611–3616 (2010).
- 657 25. Deng, K. *et al.* Rapid kinetic characterization of glycosyl hydrolases based on oxime  
658 derivatization and nanostructure-initiator mass spectrometry (NIMS). *ACS Chem. Biol.* **9**,  
659 1470–1479 (2014).
- 660 26. Barnes, W. & Anderson, C. Acetyl Bromide Soluble Lignin (ABSL) Assay for Total  
661 Lignin Quantification from Plant Biomass. *BIO-PROTOCOL* **7**, (2017).
- 662 27. DeAngelis, K. M. *et al.* Strategies for enhancing the effectiveness of metagenomic-based  
663 enzyme discovery in lignocellulolytic microbial communities. *Bioenergy Res.* **3**, 146–158  
664 (2010).
- 665 28. Edgar, R. C. Search and clustering orders of magnitude faster than BLAST.  
666 *Bioinformatics* **26**, 2460–2461 (2010).
- 667 29. Minh, B. Q. *et al.* IQ-TREE 2: New Models and Efficient Methods for Phylogenetic  
668 Inference in the Genomic Era. *Mol. Biol. Evol.* **37**, 1530–1534 (2020).
- 669 30. McMurdie, P. J. & Holmes, S. Phyloseq: An R Package for Reproducible Interactive

- 670 Analysis and Graphics of Microbiome Census Data. *PLoS One* **8**, e61217 (2013).
- 671 31. Love, M. I., Huber, W. & Anders, S. Moderated estimation of fold change and dispersion  
672 for RNA-seq data with DESeq2. *Genome Biol.* **15**, 550 (2014).
- 673 32. Prjibelski, A., Antipov, D., Meleshko, D., Lapidus, A. & Korobeynikov, A. Using SPAdes  
674 De Novo Assembler. *Curr. Protoc. Bioinforma.* **70**, (2020).
- 675 33. Zhu, W., Lomsadze, A. & Borodovsky, M. Ab initio gene identification in metagenomic  
676 sequences. *Nucleic Acids Res.* **38**, e132–e132 (2010).
- 677 34. Buchfink, B., Reuter, K. & Drost, H.-G. Sensitive protein alignments at tree-of-life scale  
678 using DIAMOND. *Nat. Methods* **18**, 366–368 (2021).
- 679 35. Huson, D. H. *et al.* MEGAN Community Edition - Interactive Exploration and Analysis of  
680 Large-Scale Microbiome Sequencing Data. *PLOS Comput. Biol.* **12**, e1004957 (2016).
- 681 36. Palumbo, A. *et al.* KBase: An Integrated Knowledgebase for Predictive Biology and  
682 Environmental Research. in *Proceedings of the International Conference on*  
683 *Bioinformatics & Computational Biology (BIOCOMP)* 1 (2014).
- 684 37. Aitchison, J. Principles of compositional data analysis. *Lect. Notes-Monograph Ser.* 73–81  
685 (1994).
- 686 38. Zhou, J. *et al.* Functional Molecular Ecological Networks. *MBio* **1**, (2010).
- 687 39. Zhou, J., Deng, Y., Luo, F., He, Z. & Yang, Y. Phylogenetic Molecular Ecological  
688 Network of Soil Microbial Communities in Response to Elevated CO<sub>2</sub>. *MBio* **2**, (2011).
- 689 40. Shannon, P. *et al.* Cytoscape: a software environment for integrated models of  
690 biomolecular interaction networks. *Genome Res.* **13**, 2498–504 (2003).
- 691 41. Godin, B. *et al.* Improved sugar yields from biomass sorghum feedstocks: Comparing  
692 low-lignin mutants and pretreatment chemistries. *Biotechnol. Biofuels* **9**, (2016).

- 693 42. Mewis, K., Lenfant, N., Lombard, V. & Henrissat, B. Dividing the large glycoside  
694 hydrolase family 43 into subfamilies: A motivation for detailed enzyme characterization.  
695 *Appl. Environ. Microbiol.* **82**, 1686–1692 (2016).
- 696 43. Brown, M. E. & Chang, M. C. Exploring bacterial lignin degradation. *Curr. Opin. Chem.*  
697 *Biol.* **19**, 1–7 (2014).
- 698 44. D’haeseleer, P. *et al.* Proteogenomic Analysis of a Thermophilic Bacterial Consortium  
699 Adapted to Deconstruct Switchgrass. *PLoS One* **8**, e68465 (2013).
- 700 45. Chen, C. Y., Hsieh, Z. S., Cheepudom, J., Yang, C. H. & Meng, M. A 24.7-kDa copper-  
701 containing oxidase, secreted by *Thermobifida fusca*, significantly increasing the  
702 xylanase/cellulase-catalyzed hydrolysis of sugarcane bagasse. *Appl. Microbiol.*  
703 *Biotechnol.* **97**, 8977–8986 (2013).
- 704 46. Davidi, L. *et al.* Toward combined delignification and saccharification of wheat straw by a  
705 laccase-containing designer cellulosome. *Proc. Natl. Acad. Sci.* **113**, 10854–10859 (2016).
- 706 47. Bittleston, L. S., Gralka, M., Leventhal, G. E., Mizrahi, I. & Cordero, O. X. Context-  
707 dependent dynamics lead to the assembly of functionally distinct microbial communities.  
708 *Nat. Commun.* **11**, 1–10 (2020).
- 709 48. Flint, H. J., Scott, K. P., Duncan, S. H., Louis, P. & Forano, E. Microbial degradation of  
710 complex carbohydrates in the gut. *Gut Microbes* **3**, 289–306 (2012).
- 711 49. Antunes, L. P. *et al.* Microbial community structure and dynamics in thermophilic  
712 composting viewed through metagenomics and metatranscriptomics. *Sci. Rep.* **6**, 38915  
713 (2016).
- 714 50. Thompson, A. W. *et al.* Robustness of a model microbial community emerges from  
715 population structure among single cells of a clonal population. *Environ. Microbiol.* **19**,

716 3059–3069 (2017).

717 51. Strous, M. & Sharp, C. Designer microbiomes for environmental, energy and health

718 biotechnology. *Curr. Opin. Microbiol.* **43**, 117–123 (2018).

719
